# Supplementary material for: Optimized sample preparation and data analysis for TMT proteomic analysis of cerebrospinal fluid applied to the identification of Alzheimer’s disease biomarkers
Source: Clin Proteomics. 2022 May 14;19:13. doi: 10.1186/s12014-022-09354-0 (PMC9107710; doi:10.1186/s12014-022-09354-0)
Supplement: Supplementary file 1 — Additional file 1. List of complete GO-terms relating to both significantly increased and decreased proteins (clinical AD vs. control) in EMIF-AD. Description of data: GO biological process terms were generated with the PANTHER statistical overrepresentation test. For significantly increased proteins, an FDR-correction was performed. [file 12014_2022_9354_MOESM1_ESM.xlsx]

## Sheet: GO_biologicalprocess_increasedp
GO biological process complete	backgroundlist.txt - REFLIST (1343)	significantlychanged_proteins_increased.txt (45)	significantlychanged_proteins_increased.txt (expected)	significantlychanged_proteins_increased.txt (over/under)	significantlychanged_proteins_increased.txt (fold Enrichment)	significantlychanged_proteins_increased.txt (raw P-value)	significantlychanged_proteins_increased.txt (FDR)
purine nucleotide metabolic process (GO:0006163)	16	9	0.54	+	16.79	2.41e-08	3.92e-05
nucleotide metabolic process (GO:0009117)	19	10	0.64	+	15.71	5.78e-09	4.71e-05
ribose phosphate metabolic process (GO:0019693)	17	9	0.57	+	15.8	3.6e-08	4.88e-05
purine ribonucleotide metabolic process (GO:0009150)	16	9	0.54	+	16.79	2.41e-08	4.9e-05
nucleoside phosphate metabolic process (GO:0006753)	21	10	0.7	+	14.21	1.22e-08	4.97e-05
ribonucleotide metabolic process (GO:0009259)	16	9	0.54	+	16.79	2.41e-08	6.54e-05
glycolytic process (GO:0006096)	8	7	0.27	+	26.11	1.24e-07	7.21e-05
purine nucleoside diphosphate metabolic process (GO:0009135)	8	7	0.27	+	26.11	1.24e-07	7.76e-05
purine ribonucleoside diphosphate metabolic process (GO:0009179)	8	7	0.27	+	26.11	1.24e-07	8.41e-05
nucleobase-containing small molecule metabolic process (GO:0055086)	27	10	0.9	+	11.05	8.32e-08	8.48e-05
purine-containing compound metabolic process (GO:0072521)	19	9	0.64	+	14.14	7.58e-08	8.82e-05
ribonucleoside diphosphate metabolic process (GO:0009185)	8	7	0.27	+	26.11	1.24e-07	9.17e-05
phosphorylation (GO:0016310)	62	13	2.08	+	6.26	2.16e-07	9.79e-05
ATP generation from ADP (GO:0006757)	8	7	0.27	+	26.11	1.24e-07	0.000101
pyruvate metabolic process (GO:0006090)	9	7	0.3	+	23.21	2.15e-07	0.000103
nucleoside diphosphate phosphorylation (GO:0006165)	9	7	0.3	+	23.21	2.15e-07	0.000109
ADP metabolic process (GO:0046031)	8	7	0.27	+	26.11	1.24e-07	0.000112
nucleotide phosphorylation (GO:0046939)	9	7	0.3	+	23.21	2.15e-07	0.000117
nucleoside diphosphate metabolic process (GO:0009132)	10	7	0.34	+	20.89	3.57e-07	0.000153
organophosphate metabolic process (GO:0019637)	57	11	1.91	+	5.76	4.67e-06	0.0019
carboxylic acid metabolic process (GO:0019752)	58	11	1.94	+	5.66	5.43e-06	0.00192
carbohydrate catabolic process (GO:0016052)	17	7	0.57	+	12.29	5.35e-06	0.00198
ATP metabolic process (GO:0046034)	17	7	0.57	+	12.29	5.35e-06	0.00207
monocarboxylic acid metabolic process (GO:0032787)	36	9	1.21	+	7.46	6.46e-06	0.00219
oxoacid metabolic process (GO:0043436)	60	11	2.01	+	5.47	7.27e-06	0.00228
organic acid metabolic process (GO:0006082)	60	11	2.01	+	5.47	7.27e-06	0.00237
phosphate-containing compound metabolic process (GO:0006796)	123	15	4.12	+	3.64	1.1e-05	0.00333
small molecule metabolic process (GO:0044281)	124	15	4.15	+	3.61	1.21e-05	0.0034
nucleobase-containing compound metabolic process (GO:0006139)	64	11	2.14	+	5.13	1.27e-05	0.00344
phosphorus metabolic process (GO:0006793)	124	15	4.15	+	3.61	1.21e-05	0.00352
generation of precursor metabolites and energy (GO:0006091)	32	8	1.07	+	7.46	2.28e-05	0.00599
heterocycle metabolic process (GO:0046483)	76	11	2.55	+	4.32	5.44e-05	0.0139
regulation of nitrogen compound metabolic process (GO:0051171)	339	24	11.36	+	2.11	8.82e-05	0.0218
negative regulation of cellular process (GO:0048523)	468	29	15.68	+	1.85	9.69e-05	0.0226
regulation of protein dephosphorylation (GO:0035304)	11	5	0.37	+	13.57	9.58e-05	0.0229
organelle transport along microtubule (GO:0072384)	1	3	0.03	+	89.53	0.000125	0.0275
regulation of phosphorus metabolic process (GO:0051174)	154	15	5.16	+	2.91	0.000133	0.0278
establishment of mitochondrion localization (GO:0051654)	1	3	0.03	+	89.53	0.000125	0.0282
regulation of phosphate metabolic process (GO:0019220)	154	15	5.16	+	2.91	0.000133	0.0286
negative regulation of biological process (GO:0048519)	510	30	17.09	+	1.76	0.000148	0.0302
negative regulation of protein modification process (GO:0031400)	44	8	1.47	+	5.43	0.000166	0.0331
regulation of dephosphorylation (GO:0035303)	13	5	0.44	+	11.48	0.000179	0.0347
cellular aromatic compound metabolic process (GO:0006725)	88	11	2.95	+	3.73	0.000184	0.0349
negative regulation of phosphate metabolic process (GO:0045936)	46	8	1.54	+	5.19	0.000219	0.0397
negative regulation of phosphorus metabolic process (GO:0010563)	46	8	1.54	+	5.19	0.000219	0.0406

## Sheet: GO_biologicalprocess_decreasedp
GO biological process complete	backgroundlist.txt - REFLIST (1343)	significantlychanged_proteins_decreased.txt (18)	significantlychanged_proteins_decreased.txt (expected)	significantlychanged_proteins_decreased.txt (over/under)	significantlychanged_proteins_decreased.txt (fold Enrichment)	significantlychanged_proteins_decreased.txt (raw P-value)
chemical synaptic transmission (GO:0007268)	42	6	0.56	+	10.66	1.89e-05
anterograde trans-synaptic signaling (GO:0098916)	42	6	0.56	+	10.66	1.89e-05
trans-synaptic signaling (GO:0099537)	51	6	0.68	+	8.78	5.21e-05
cell-cell signaling (GO:0007267)	111	8	1.49	+	5.38	5.63e-05
synaptic signaling (GO:0099536)	54	6	0.72	+	8.29	7.02e-05
protein secretion (GO:0009306)	14	3	0.19	+	15.99	0.00118
establishment of protein localization to extracellular region (GO:0035592)	15	3	0.2	+	14.92	0.0014
protein transport (GO:0015031)	66	5	0.88	+	5.65	0.00169
protein localization to extracellular region (GO:0071692)	18	3	0.24	+	12.44	0.00223
regulation of postsynaptic neurotransmitter receptor activity (GO:0098962)	4	2	0.05	+	37.31	0.0024
insulin secretion (GO:0030073)	4	2	0.05	+	37.31	0.0024
establishment of protein localization (GO:0045184)	77	5	1.03	+	4.84	0.00323
neuropeptide signaling pathway (GO:0007218)	22	3	0.29	+	10.17	0.00373
nitrogen compound transport (GO:0071705)	88	5	1.18	+	4.24	0.00562
response to cold (GO:0009409)	8	2	0.11	+	18.65	0.00699
N-glycan processing (GO:0006491)	8	2	0.11	+	18.65	0.00699
regulation of hormone levels (GO:0010817)	60	4	0.8	+	4.97	0.00828
peptide hormone secretion (GO:0030072)	9	2	0.12	+	16.58	0.00847
peptide secretion (GO:0002790)	9	2	0.12	+	16.58	0.00847
G protein-coupled receptor signaling pathway (GO:0007186)	61	4	0.82	+	4.89	0.00875
peptide transport (GO:0015833)	10	2	0.13	+	14.92	0.0101
negative regulation of cellular process (GO:0048523)	468	1	6.27	-	0.16	0.0101
signaling (GO:0023052)	469	12	6.29	+	1.91	0.0105
regulation of metabolic process (GO:0019222)	442	1	5.92	-	0.17	0.0107
cell communication (GO:0007154)	485	12	6.5	+	1.85	0.0117
hormone secretion (GO:0046879)	11	2	0.15	+	13.57	0.0118
positive regulation of cellular process (GO:0048522)	537	2	7.2	-	0.28	0.0136
response to cAMP (GO:0051591)	13	2	0.17	+	11.48	0.0157
regulation of neurotransmitter receptor activity (GO:0099601)	14	2	0.19	+	10.66	0.0178
hormone transport (GO:0009914)	14	2	0.19	+	10.66	0.0178
organic substance transport (GO:0071702)	119	5	1.59	+	3.13	0.0188
amide transport (GO:0042886)	15	2	0.2	+	9.95	0.02
response to organophosphorus (GO:0046683)	16	2	0.21	+	9.33	0.0223
response to purine-containing compound (GO:0014074)	17	2	0.23	+	8.78	0.0247
startle response (GO:0001964)	1	1	0.01	+	74.61	0.0263
positive regulation of fear response (GO:1903367)	1	1	0.01	+	74.61	0.0263
positive regulation of behavioral fear response (GO:2000987)	1	1	0.01	+	74.61	0.0263
inositol phosphate-mediated signaling (GO:0048016)	1	1	0.01	+	74.61	0.0263
ubiquitin-dependent glycoprotein ERAD pathway (GO:0097466)	1	1	0.01	+	74.61	0.0263
synaptic signaling via neuropeptide (GO:0099538)	1	1	0.01	+	74.61	0.0263
response to glycoprotein (GO:1904587)	1	1	0.01	+	74.61	0.0263
induction of positive chemotaxis (GO:0050930)	1	1	0.01	+	74.61	0.0263
mannose trimming involved in glycoprotein ERAD pathway (GO:1904382)	1	1	0.01	+	74.61	0.0263
eosinophil migration (GO:0072677)	1	1	0.01	+	74.61	0.0263
positive regulation of response to nutrient levels (GO:0032109)	1	1	0.01	+	74.61	0.0263
positive regulation of response to extracellular stimulus (GO:0032106)	1	1	0.01	+	74.61	0.0263
positive regulation of appetite (GO:0032100)	1	1	0.01	+	74.61	0.0263
positive regulation of response to food (GO:0032097)	1	1	0.01	+	74.61	0.0263
protein deglycosylation involved in glycoprotein catabolic process (GO:0035977)	1	1	0.01	+	74.61	0.0263
eosinophil chemotaxis (GO:0048245)	1	1	0.01	+	74.61	0.0263
secretion by cell (GO:0032940)	49	3	0.66	+	4.57	0.0286
carbohydrate homeostasis (GO:0033500)	19	2	0.25	+	7.85	0.0299
glucose homeostasis (GO:0042593)	19	2	0.25	+	7.85	0.0299
pallium development (GO:0021543)	20	2	0.27	+	7.46	0.0326
response to temperature stimulus (GO:0009266)	20	2	0.27	+	7.46	0.0326
protein localization (GO:0008104)	138	5	1.85	+	2.7	0.0331
regulation of macromolecule metabolic process (GO:0060255)	399	1	5.35	-	0.19	0.0331
regulation of cellular metabolic process (GO:0031323)	370	1	4.96	-	0.2	0.0345
export from cell (GO:0140352)	53	3	0.71	+	4.22	0.0347
second-messenger-mediated signaling (GO:0019932)	21	2	0.28	+	7.11	0.0355
signal release (GO:0023061)	22	2	0.29	+	6.78	0.0384
response to epinephrine (GO:0071871)	2	1	0.03	+	37.31	0.0392
regulation of fear response (GO:1903365)	2	1	0.03	+	37.31	0.0392
regulation of behavioral fear response (GO:2000822)	2	1	0.03	+	37.31	0.0392
aggressive behavior (GO:0002118)	2	1	0.03	+	37.31	0.0392
protein targeting to ER (GO:0045047)	2	1	0.03	+	37.31	0.0392
adult feeding behavior (GO:0008343)	2	1	0.03	+	37.31	0.0392
Golgi apparatus mannose trimming (GO:1904381)	2	1	0.03	+	37.31	0.0392
positive regulation of behavior (GO:0048520)	2	1	0.03	+	37.31	0.0392
establishment of protein localization to endoplasmic reticulum (GO:0072599)	2	1	0.03	+	37.31	0.0392
intestinal epithelial cell differentiation (GO:0060575)	2	1	0.03	+	37.31	0.0392
negative regulation of GTPase activity (GO:0034260)	2	1	0.03	+	37.31	0.0392
cellular response to virus (GO:0098586)	2	1	0.03	+	37.31	0.0392
response to nutrient levels (GO:0031667)	56	3	0.75	+	4	0.0397
response to extracellular stimulus (GO:0009991)	57	3	0.76	+	3.93	0.0415
regulation of GTPase activity (GO:0043087)	24	2	0.32	+	6.22	0.0445
regulation of signaling receptor activity (GO:0010469)	24	2	0.32	+	6.22	0.0445
secretion (GO:0046903)	60	3	0.8	+	3.73	0.0469
